# Supplementary material for: Hepatitis B vaccination coverage in Germany: systematic review
Source: PubMed Central journal article supplement (PMC8364709; doi:10.1186/s12879-021-06400-4), 2021-08-14
Supplement: 12879_2021_6400_MOESM1_ESM.pdf [file 12879_2021_6400_MOESM1_ESM.pdf]

## Study selection criteria

| Inclusion criteria                                                                                                                                                                                                                                                                                                                                                                                                                                                                                                                                                                                                                                                                                                                                                                                                                          | Exclusion criteria                                                                                                                                                                                                                                                                                                                                                                                                                                                                                                                                                                                                                                                                                                                                                        |
|---------------------------------------------------------------------------------------------------------------------------------------------------------------------------------------------------------------------------------------------------------------------------------------------------------------------------------------------------------------------------------------------------------------------------------------------------------------------------------------------------------------------------------------------------------------------------------------------------------------------------------------------------------------------------------------------------------------------------------------------------------------------------------------------------------------------------------------------|---------------------------------------------------------------------------------------------------------------------------------------------------------------------------------------------------------------------------------------------------------------------------------------------------------------------------------------------------------------------------------------------------------------------------------------------------------------------------------------------------------------------------------------------------------------------------------------------------------------------------------------------------------------------------------------------------------------------------------------------------------------------------|
| <p>Time frame data collection:<br/>data collection finished after 1/1/2005</p> <p>Geographic location:<br/>data collection in Germany</p> <p>Setting:<br/>no restrictions</p> <p>Participants:<br/>no restrictions</p> <p>Reported outcomes:<br/>HBV vaccination coverage in humans</p>                                                                                                                                                                                                                                                                                                                                                                                                                                                                                                                                                     | <p>Time frame data collection:<br/>data collection finished before 1/1/2005</p> <p>Geographic location:<br/>no data from Germany</p> <p>Reported outcomes:<br/>no report of vaccination coverage</p>                                                                                                                                                                                                                                                                                                                                                                                                                                                                                                                                                                      |
| <p>Time frame publication:<br/>published after 01/01/2005</p> <p>Study design:</p> <ul style="list-style-type: none"> <li>• original study data of observational studies <ul style="list-style-type: none"> <li>○ cross-sectional studies</li> <li>○ cohort studies</li> <li>○ cases of case-control studies</li> <li>○ case series</li> </ul> </li> <li>• surveillance data</li> <li>• secondary/registry data</li> <li>• meta-data from systematic reviews</li> </ul> <p>Type of publication:<br/>Original work with clear origin of analysed data</p> <ul style="list-style-type: none"> <li>• articles in scientific journals</li> <li>• reports</li> <li>• dissertations</li> <li>• conference abstracts including data on research question plus additional information from author</li> </ul> <p>Peer review:<br/>no restriction</p> | <p>Time frame publication:<br/>Published before 01/01/2005</p> <p>Study design:<br/>Expert opinions, narrative reviews, editorials, comments</p> <p>Type of publication:</p> <ul style="list-style-type: none"> <li>• Non-published data</li> <li>• Abstracts: No full text existing or available for study team, no relevant data on outcome in the abstract, no consultation of the data provider possible</li> <li>• Data already used in other publication (Publications reporting identical outcomes of the same study and no new and relevant aspects according to the research questions) → publication with more relevant information will be included</li> </ul> <p>Availability:</p> <ul style="list-style-type: none"> <li>• No full text available</li> </ul> |

Publication language:  
no restriction

Availability:

- full text available
- abstracts if additional information available

Quality standards:

- report of n study population
- description of setting/study population
- year of data collection
- study tool for outcome

- Abstract with no additional information from author

Quality standards:

- No report of n study population
- No description of setting/study population
- No year of data collection reported
- No study tool for outcome reported
