# Supplementary material for: Hepatitis B vaccination coverage in Germany: systematic review
Source: PubMed Central journal article supplement (PMC8364709; doi:10.1186/s12879-021-06400-4), 2021-08-14
Supplement: 12879_2021_6400_MOESM2_ESM.pdf [file 12879_2021_6400_MOESM2_ESM.pdf]

## Search string

**Search in Medline (full-text search; date of last search: 06 July 2020, search restricted to 1 January 2017 – 06 July 2020; filters: English and German language):**

(("Hepatitis B"[MESH] OR hepatitis b [Title/Abstract] OR hepatitis b [Text word] OR HBV[Title/Abstract] OR HBV [Text word])

### **AND**

(European Union [Title/Abstract]  
OR EU [Title/Abstract]  
OR EEA [Title/Abstract]  
OR europ\* [Title/Abstract]  
OR germany [MESH]  
OR german\* [Title/Abstract]  
OR Nordrhein-Westfalia [Title/Abstract]  
OR Hesse [Title/Abstract]  
OR Brandenburg [Title/Abstract]  
OR Lower Saxony [Title/Abstract]  
OR Baden-Württemberg [Title/Abstract]  
OR Bavaria [Title/Abstract]  
OR Mecklenburg-Vorpommern [Title/Abstract]  
OR Rhineland-Palatinate [Title/Abstract]  
OR Saarland [Title/Abstract]  
OR Saxony [Title/Abstract]  
OR Schleswig-Holstein [Title/Abstract]  
OR Thuringia [Title/Abstract]  
OR Saarland [Title/Abstract]  
OR Hamburg [Title/Abstract]  
OR Bremen [Title/Abstract]  
OR Berlin [Title/Abstract]  
OR Sachsen-Anhalt [Title/Abstract]  
OR Saxony-Anhalt [Title/Abstract]  
OR Mecklenburg [Title/Abstract]  
OR Western Pomerania [Title/Abstract])  
OR Europäische Union [Title/Abstract]  
OR deutsch\* [Title/Abstract]  
OR Nordrhein-Westfalen [Title/Abstract]  
OR Hessen [Title/Abstract]  
OR Niedersachsen [Title/Abstract]  
OR Baden-Württemberg [Title/Abstract]  
OR Bayern [Title/Abstract]  
OR Rheinland-Pfalz [Title/Abstract]  
OR Sachsen [Title/Abstract]  
OR Thüringen [Title/Abstract]  
OR European Union [Text Word]  
OR EU [Text Word]  
OR EEA [Text Word]  
OR europ\* [Text Word]  
OR german\* [Text Word]  
OR Nordrhein-Westfalia [Text Word]  
OR Hesse [Text Word]  
OR Brandenburg [Text Word]

OR Lower Saxony [Text Word]  
OR Baden-Württemberg [Text Word]  
OR Bavaria [Text Word]  
OR Mecklenburg-Vorpommern [Text Word]  
OR Rhineland-Palatinate [Text Word]  
OR Saarland [Text Word]  
OR Saxony [Text Word]  
OR Schleswig-Holstein [Text Word]  
OR Thuringia [Text Word]  
OR Saarland [Text Word]  
OR Hamburg [Text Word]  
OR Bremen [Text Word]  
OR Berlin [Text Word]  
OR Sachsen-Anhalt [Text Word]  
OR Saxony-Anhalt [Text Word]  
OR Mecklenburg [Text Word]  
OR Western Pomerania [Text Word]  
OR Europäische Union [Text Word]  
OR deutsch\* [Text Word]  
OR Nordrhein-Westfalen [Text Word]  
OR Hessen [Text Word]  
OR Niedersachsen [Text Word]  
OR Baden-Württemberg [Text Word]  
OR Bayern [Text Word]  
OR Rheinland-Pfalz [Text Word]  
OR Sachsen [Text Word]  
OR Thüringen [Text Word])

**AND**

(prevalence [MESH] OR prevalence [Title/Abstract] OR prevalence [Text Word] OR vaccination[MESH]  
OR vaccin\* [Title/Abstract] OR vaccin\* [Text word]  
OR immun\* [Title/Abstract] OR immun\*[tw] OR vaccination coverage [MESH] OR vaccination  
coverage [Title/Abstract] OR vaccination coverage [Text Word]))

**Search in Embase (full-text search; date of last search: 06 July 2020, search restricted to 1 January 2017 – 06 July 2020; filters: English and German language):**

(("Hepatitis B"/syn OR "Hepatitis B"/exp OR "hepatitis b":ti,ab OR "hepatitis b [Text word]" OR 'hbv':ti,ab OR 'hbv [text word]')

**AND**

(germany/syn  
OR germany/exp  
OR german\*:ti,ab  
OR "European Union":ti,ab  
OR EU:ti,ab OR EEA:ti,ab  
OR europ\*:ti,ab  
OR Nordrhine-Westfalia:ti,ab  
OR Hesse:ti,ab  
OR Brandenburg:ti,ab  
OR "Lower Saxony":ti,ab  
OR Baden-Württemberg:ti,ab  
OR Bavaria:ti,ab  
OR Mecklenburg-Vorpommern:ti,ab

OR Rhineland-Palatinate:ti,ab  
OR Saarland:ti,ab  
OR Saxony:ti,ab  
OR Schleswig-Holstein:ti,ab  
OR Thuringia:ti,ab  
OR deutsch\*:ti,ab  
OR "Europäische Union":ti,ab  
OR Nordrhein-Westfalen:ti,ab  
OR Hessen:ti,ab  
OR Niedersachsen:ti,ab  
OR Baden-Württemberg:ti,ab  
OR Bayern:ti,ab  
OR Rheinland-Pfalz:ti,ab  
OR Sachsen:ti,ab  
OR Thüringen:ti,ab  
OR "European Union [Text Word]"  
OR "EU [Text Word]"  
OR "EEA [Text Word]"  
OR "europ\* [Text Word]"  
OR "german\* [Text Word]"  
OR "Nordrhine-Westfalia [Text Word]"  
OR "Hesse [Text Word]"  
OR "Brandenburg [Text Word]"  
OR "Lower Saxony [Text Word]"  
OR "Baden-Wurttemberg [Text Word]"  
OR "Bavaria [Text Word]"  
OR "Mecklenburg-Vorpommern [Text Word]"  
OR "Rhineland-Palatinate [Text Word]"  
OR "Saarland [Text Word]"  
OR "Saxony [Text Word]"  
OR "Schleswig-Holstein [Text Word]"  
OR "Thuringia [Text Word]"  
OR "deutsch\* [Text Word]"  
OR "Europäische Union [Text Word]"  
OR "Nordrhein-Westfalen [Text Word]"  
OR "Hessen [Text Word]"  
OR "Niedersachsen [Text Word]"  
OR "Baden-Württemberg [Text Word]"  
OR "Bayern [Text Word]"  
OR "Rheinland-Pfalz [Text Word]"  
OR "Sachsen [Text Word]"  
OR "Thüringen [Text Word]"  
OR "Saarland [Text Word]"  
OR "Hamburg [Text Word]"  
OR "Bremen [Text Word]"  
OR "Berlin [Text Word]"  
OR "Sachsen-Anhalt [Text Word]"  
OR "Saxony-Anhalt [Text Word]"  
OR "Mecklenburg [Text Word]"  
OR "Western Pomerania [Text Word]")

**AND**

('prevalence'/syn OR 'prevalence'/exp OR prevalence:ti,ab OR 'prevalence [text word]' OR  
'vaccination'/exp OR 'vaccination'/syn OR vaccin\*:ti,ab OR 'vaccination [text word]' OR 'vaccination

coverage'/exp OR 'vaccination coverage'/syn OR 'vaccination coverage':ti,ab OR 'vaccination coverage [text word]' OR immun\*:ti,ab OR 'immunization [text word]' OR 'immunisation [text word]' OR prävelanz:ti,ab OR impfung:ti,ab OR impfabdeckung:ti,ab OR 'impfabdeckung [textword]' OR impfrate:ti,ab OR 'impfrate [textword]' OR impfquote:ti,ab OR 'impfquote [textword]'))

**Search in Livivo (full-text search; date of last search: 9 March 2017, search restricted to 1 January 2017 – 06 July 2020; filters: English and German language):**

(" hepatitis b" OR HBV)

**AND**

(" European Union"

OR EU

OR EEA

OR europe

OR european

OR europ\*

OR germany

OR german

OR german\*

OR Nordrhein-Westfalia

OR Hesse

OR Brandenburg

OR Lower Saxony

OR Baden-Wurttemberg

OR Bavaria

OR Mecklenburg-Vorpommern

OR Rhineland-Palatinate

OR Saarland OR Saxony

OR Schleswig-Holstein

OR Thuringia

OR deutsch\*

OR "Europäische Union"

OR Nordrhein-Westfalen

OR Hessen

OR Niedersachsen

OR Baden-Württemberg

OR Bayern

OR Rheinland-Pfalz

OR Sachsen

OR Thüringen

OR Schleswig-Holstein

OR Brandenburg

OR Mecklenburg-Vorpommern

OR Saarland

OR Hamburg

OR Bremen

OR Berlin

OR Sachsen-Anhalt

OR Saxony-anhalt

OR Mecklenburg

OR Western Pomerania)

**AND**

(prevalence OR vaccination OR vaccinated OR vaccin\* OR immunization OR immunisation OR immunised OR immun\* OR vaccination coverage OR "vaccination coverage" OR prävelanz OR impf\* OR "Impfquote" OR "Impfabdeckung" OR "Impfrate"))
